# Supplementary material for: Slow magnetic relaxation in a 4,2-ribbon like FeIII2CoII heterobimetallic chain
Source: Royal Society of Chemistry journal article supplement (doi:10.1039/c2dt31168b), 2012-01-01
Supplement: c2dt31168b.pdf [file c2dt31168b.pdf]

## **Supplementary materials**

# Slow Magnetic Relaxation in a 4,2-Ribbon like Fe<sup>III</sup><sub>2</sub>Co<sup>II</sup> Heterobimetallic Chain

**Soonchul Kang, Shinji Kanegawa and Osamu Sato**

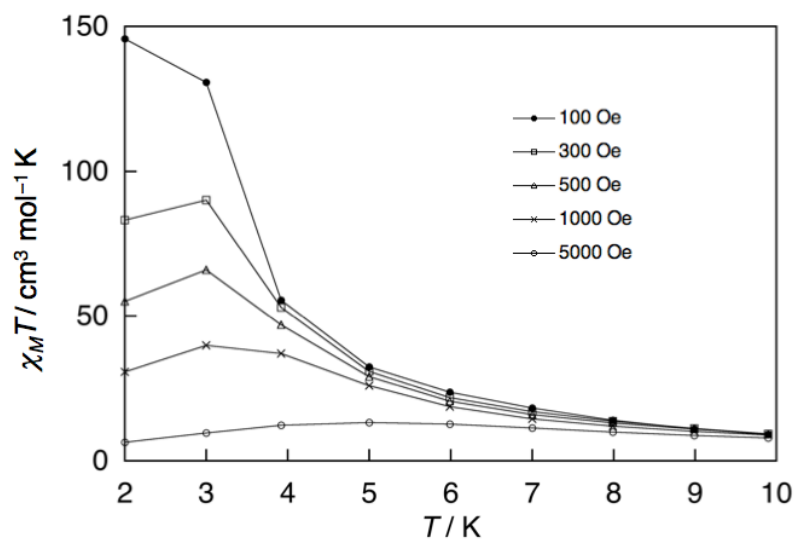

Fig. S1 Field dependence of magnetic susceptibility in the form of  $\chi_M T$  versus  $T$  for **1**.

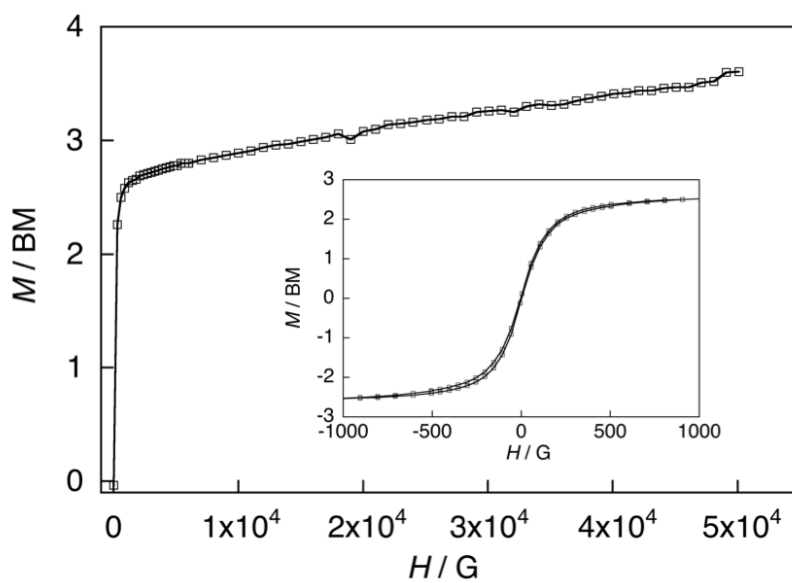

Fig. S2 Field dependence of  $M$  for **1** at 2.0 K.

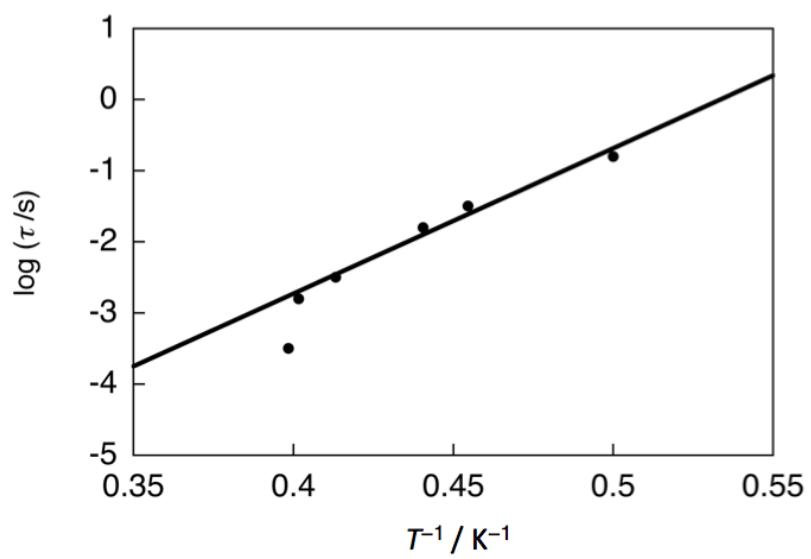

**Fig. S3** Arrhenius plots for **1**.

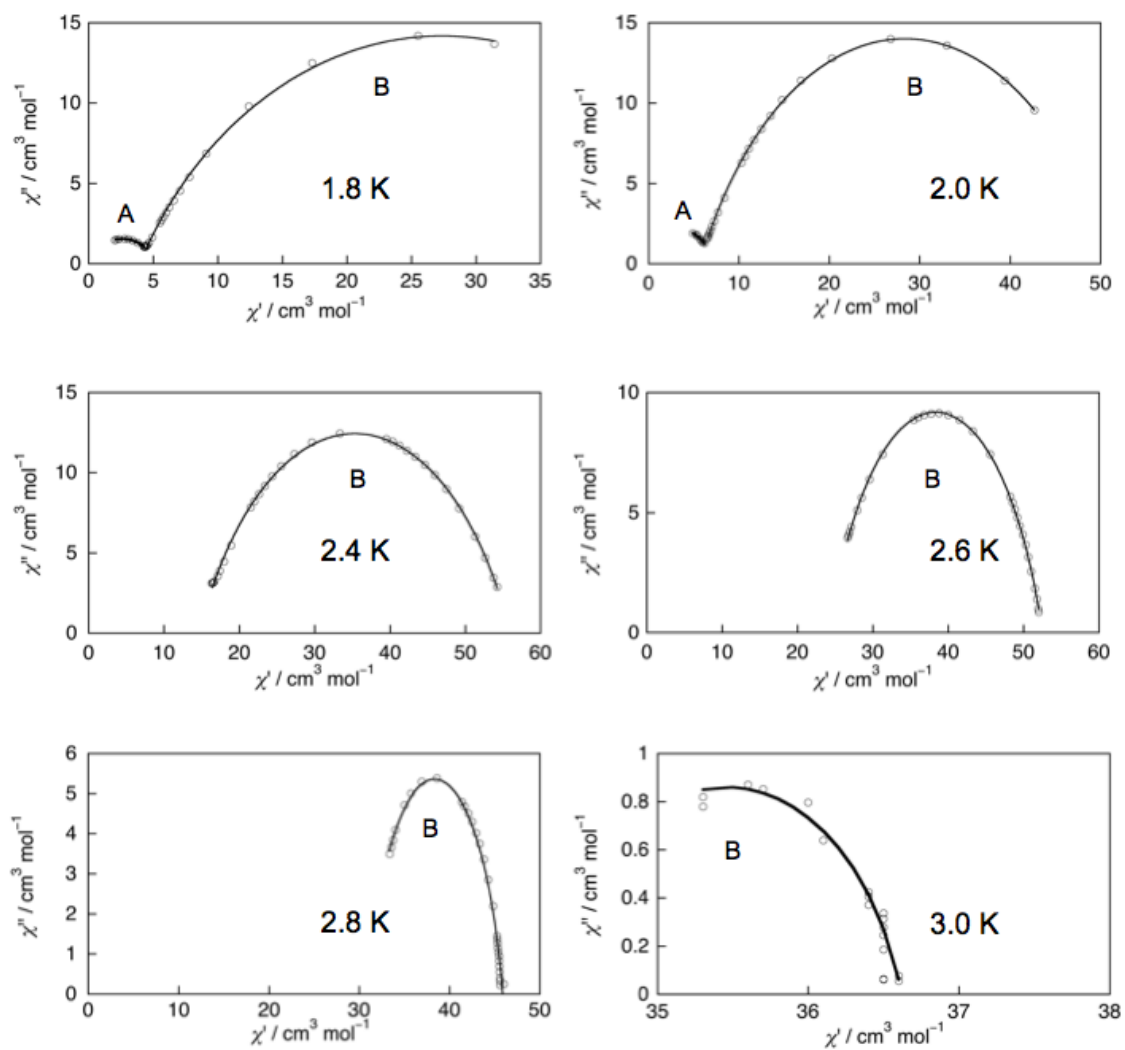

**Fig. S4** Cole–Cole plots for **1** at different temperature. The solid line represents the best-fit curve.

**Table S1** Selected ac magnetic data for **1**

|       | $\chi_{S(A)}/\chi_{S(B)}$ | $\chi_{T(A)}/\chi_{T(B)}$ | $\alpha_{(A)}/\alpha_{(B)}$ |
|-------|---------------------------|---------------------------|-----------------------------|
| 1.8 K | 0.00/3.94                 | 5.27/50.73                | 0.33/0.31                   |
| 2.0 K | 0.00/5.72                 | 7.29/51.01                | 0.33/0.29                   |
| 2.4 K | -/14.63                   | -/55.94                   | -/0.31                      |
| 2.6 K | -/24.17                   | -/52.47                   | -/0.27                      |
| 2.8 K | -/30.80                   | -/45.90                   | -/0.21                      |
| 3.0 K | -/34.30                   | -/36.62                   | -/0.19                      |

(a) Adiabatic and (b) isothermal susceptibilities and (c) Cole-Cole parameter in the following equation :

$$\chi''(\chi) = \frac{\chi_T - \chi_S}{2 \tan[(1+\alpha)\pi/2]} \left\{ (\chi' - \chi_S)(\chi_T - \chi') + \frac{(\chi_T - \chi_S)^2}{4 \tan^2[(1-\alpha)\pi/2]} \right\}^{1/2}$$
